# Supplementary material for: Single vesicle analysis of CD47 association with integrins and tetraspanins on extracellular vesicles released by T lymphoblast and prostate carcinoma cells
Source: PubMed Central journal article supplement — J Extracell Vesicles. 2022 Sep 15;11(9):e12265. doi: 10.1002/jev2.12265 (PMC9477112; doi:10.1002/jev2.12265), 2022-09-15

Figure S1

A

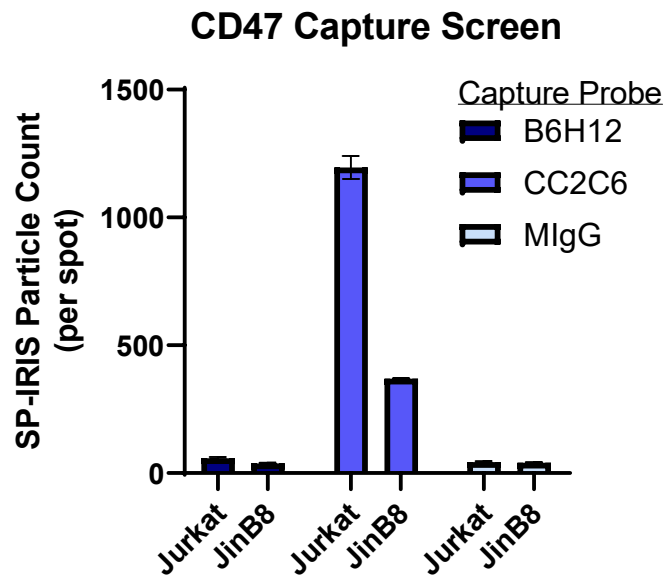

B

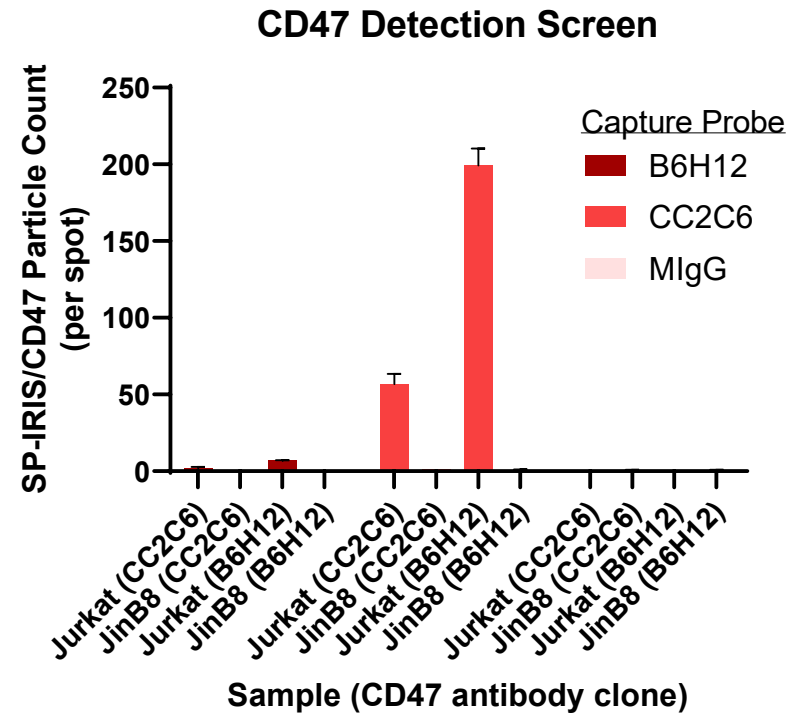

C

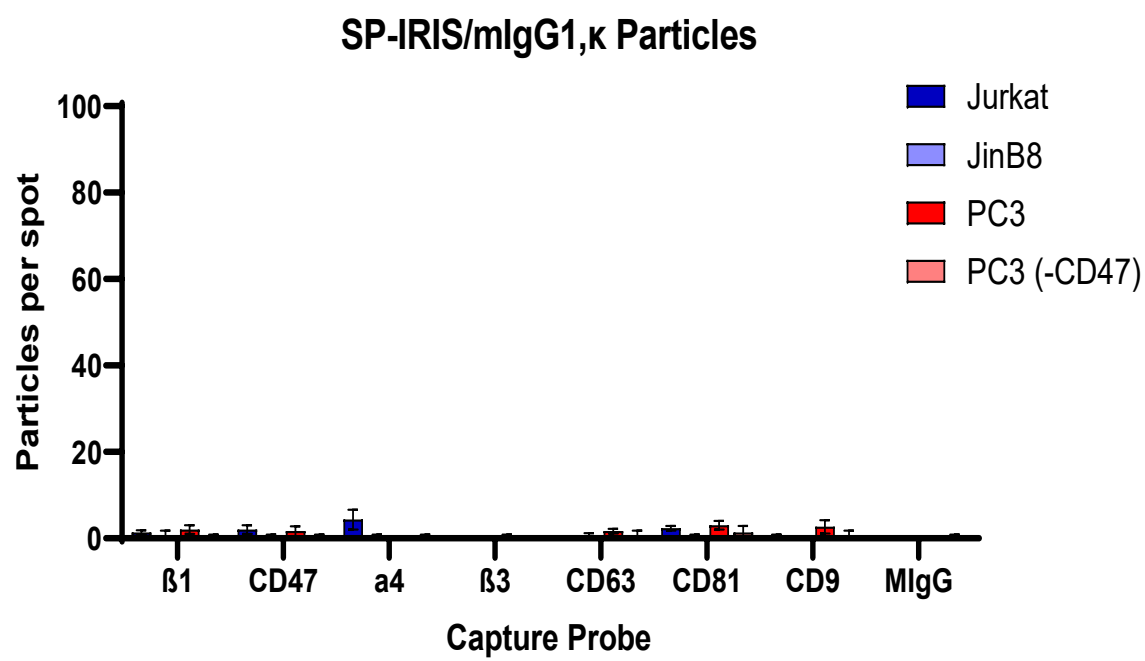

D

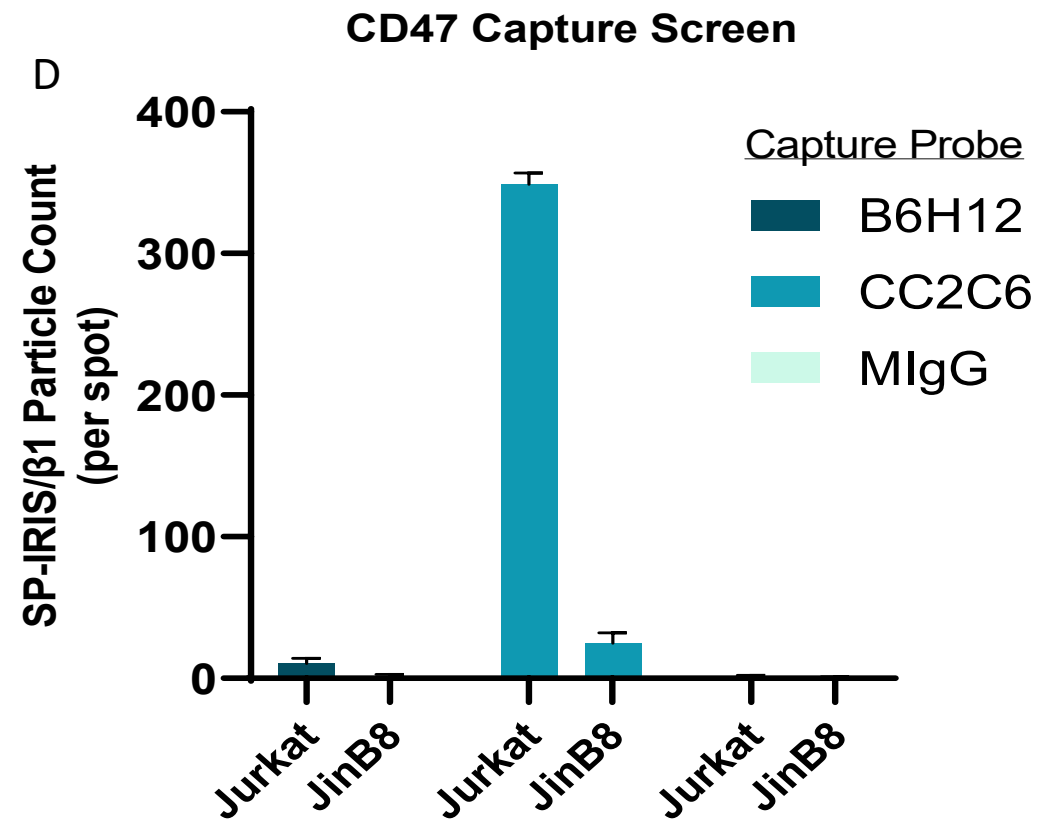

E

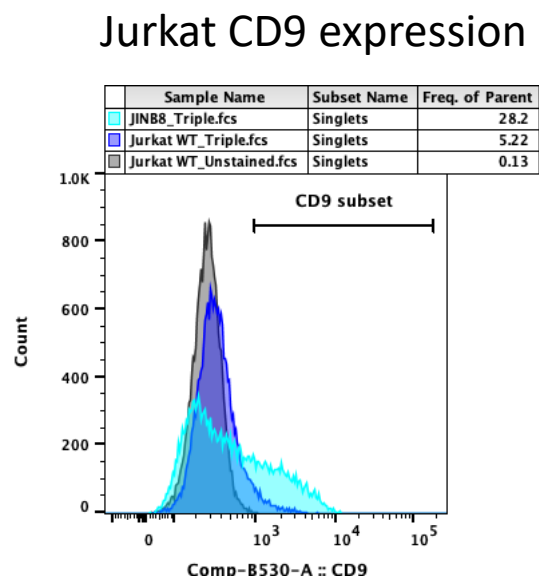

F

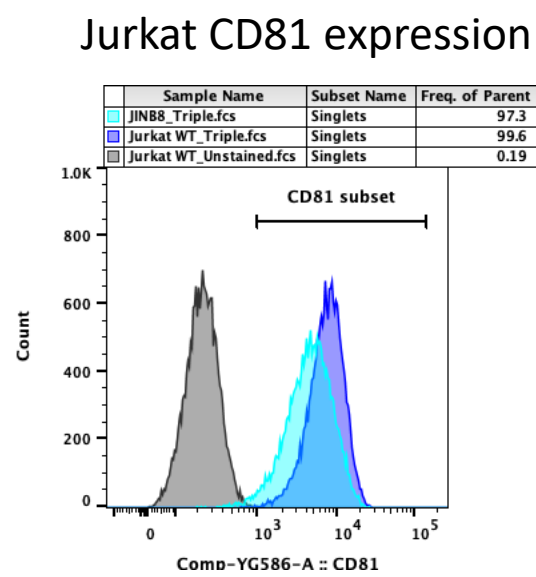

G

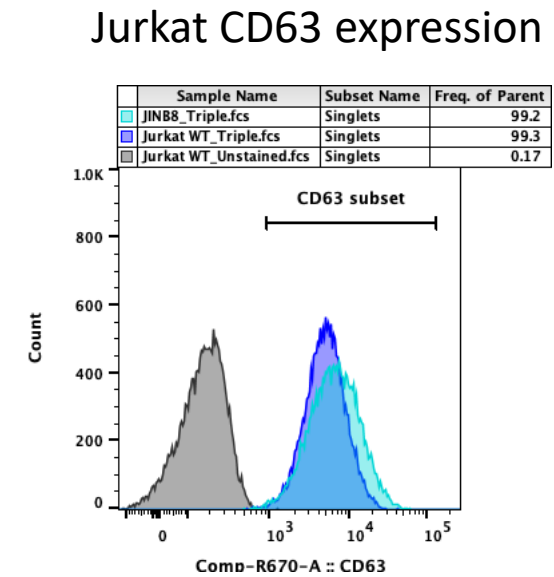

H

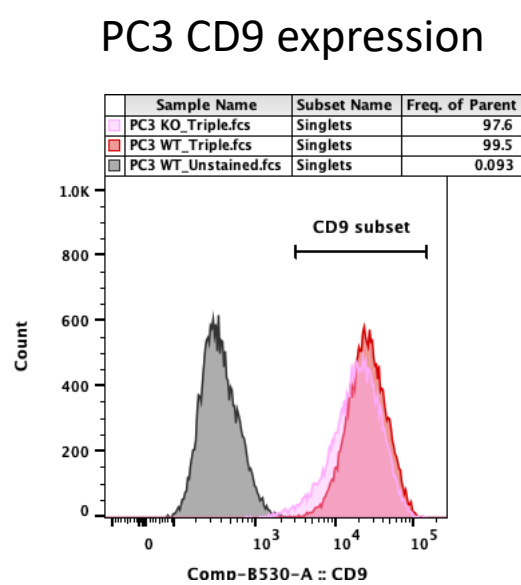

I

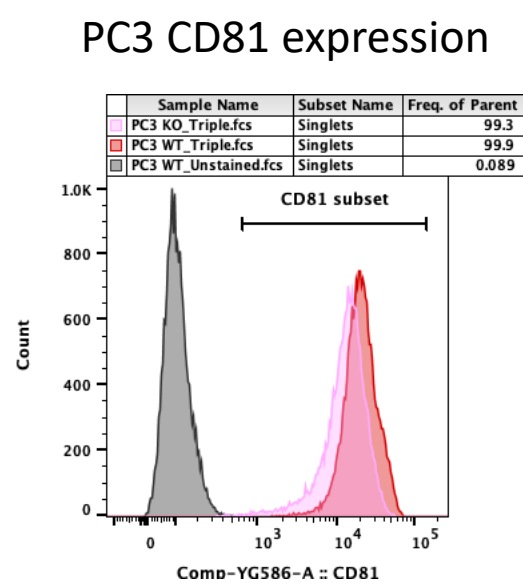

J

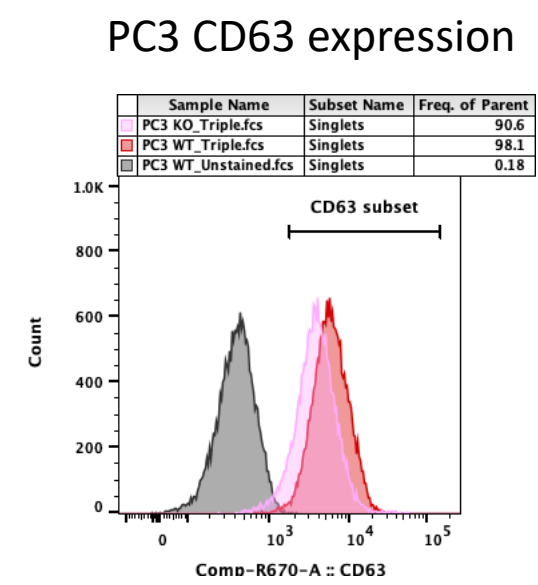

Figure S2

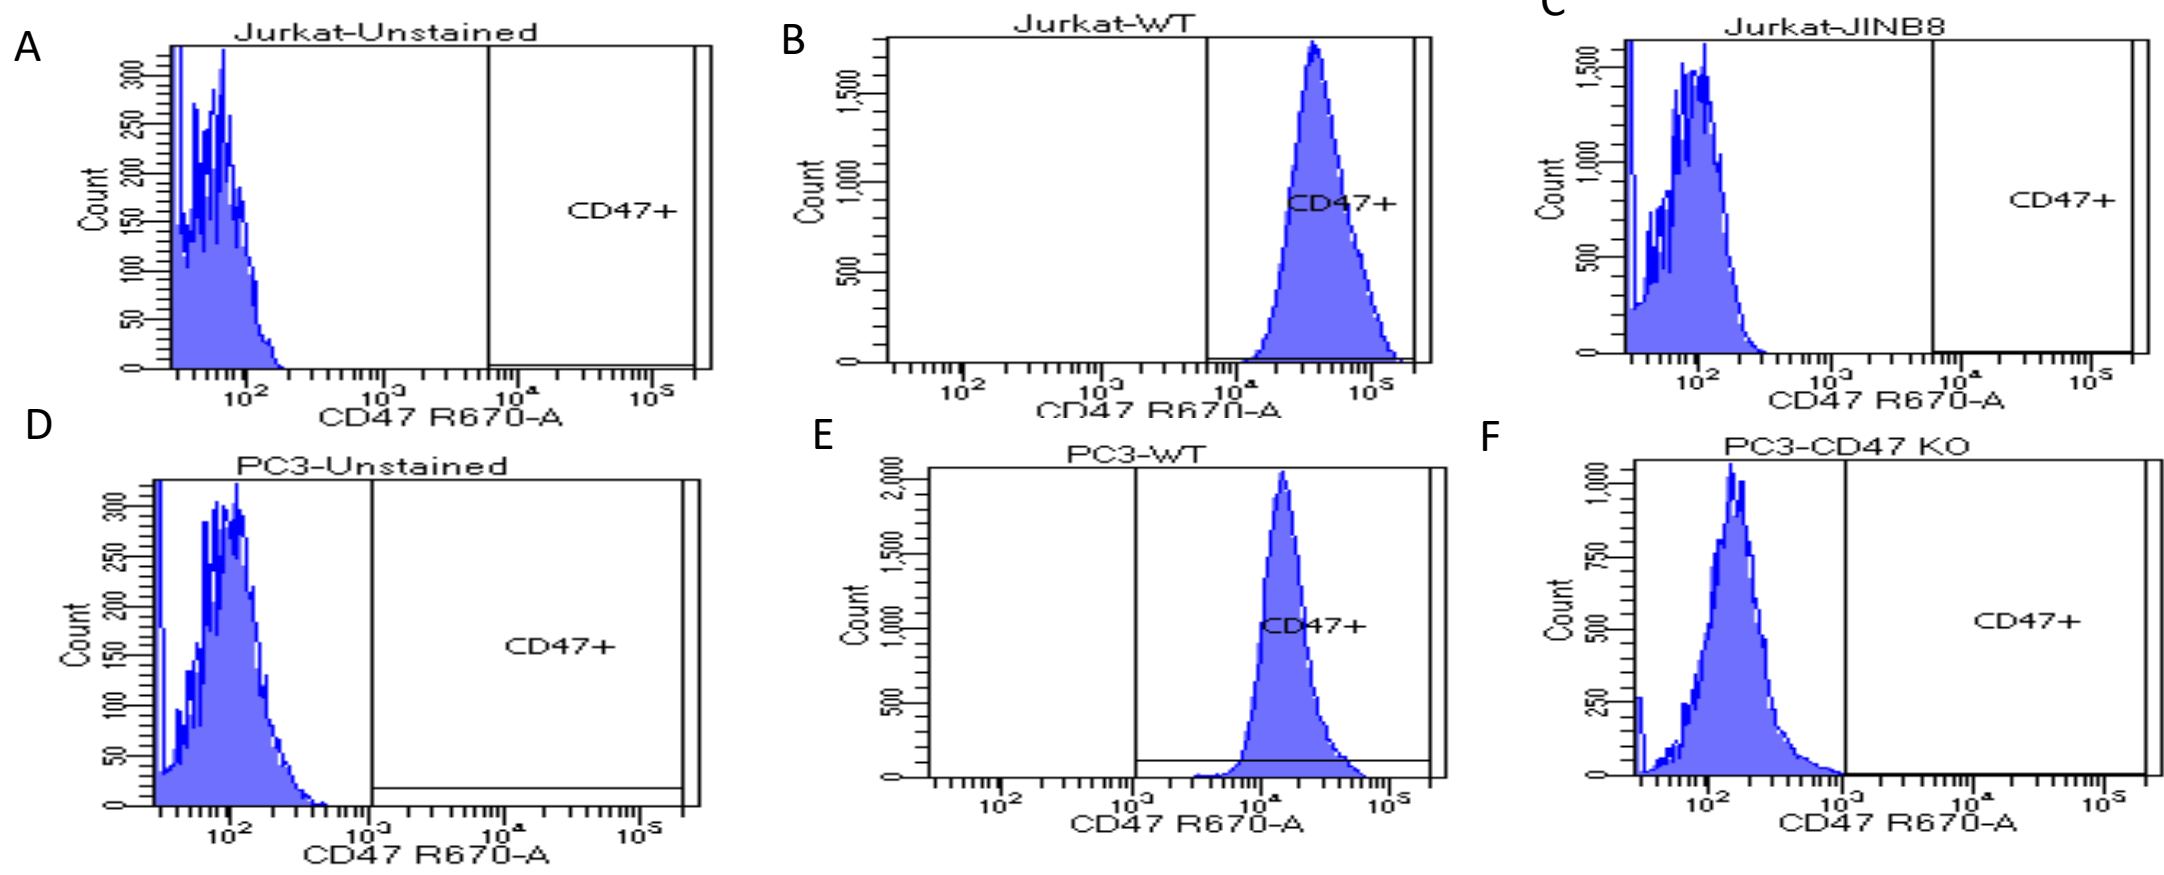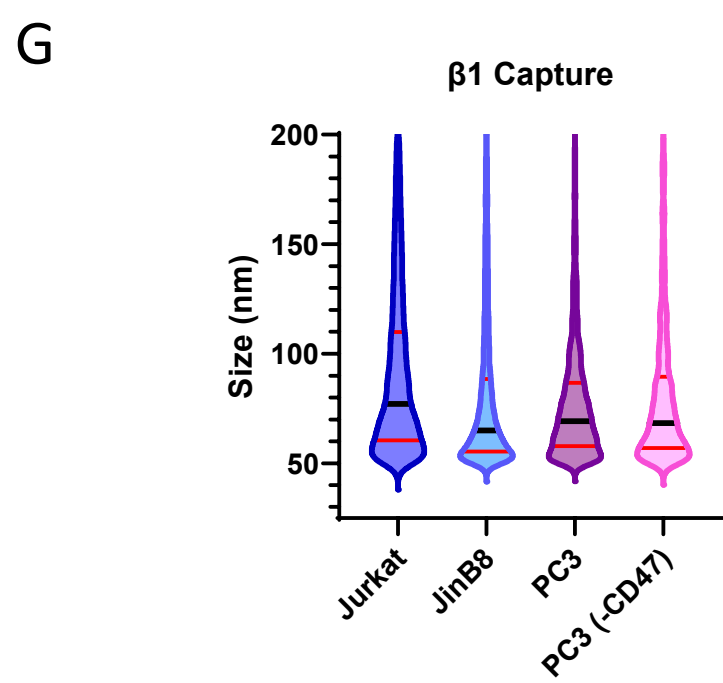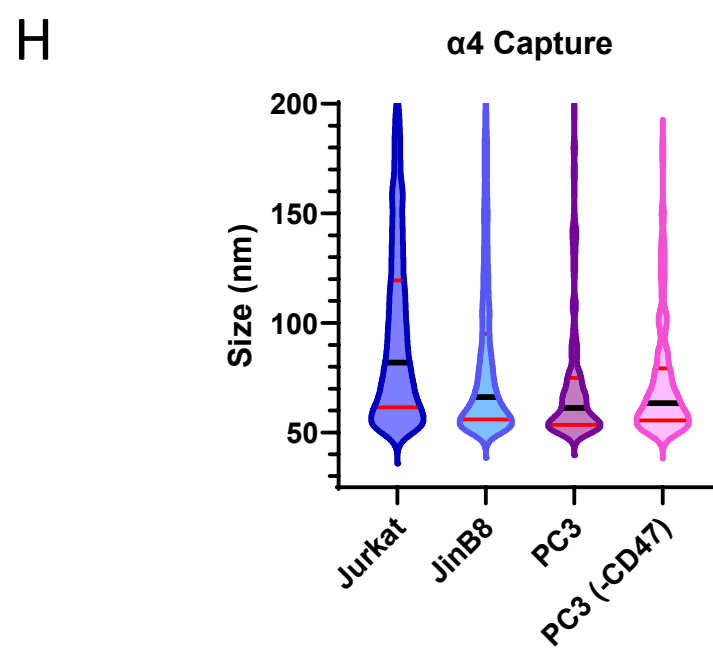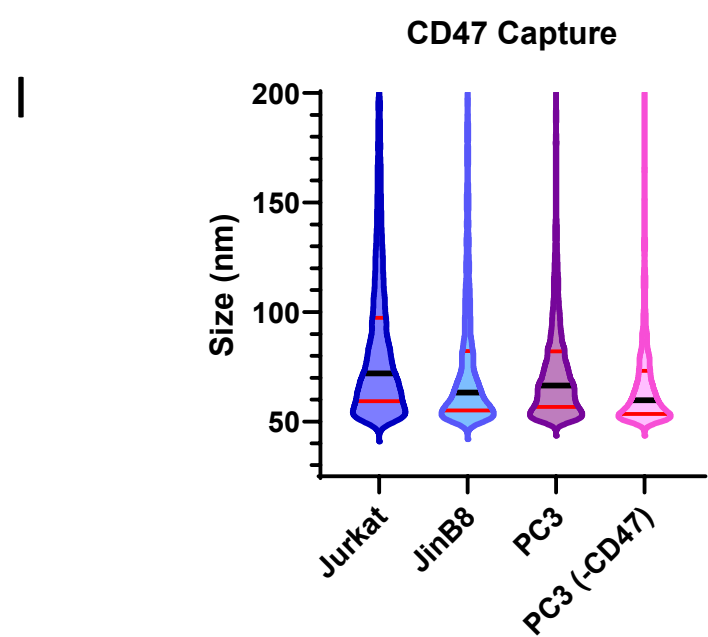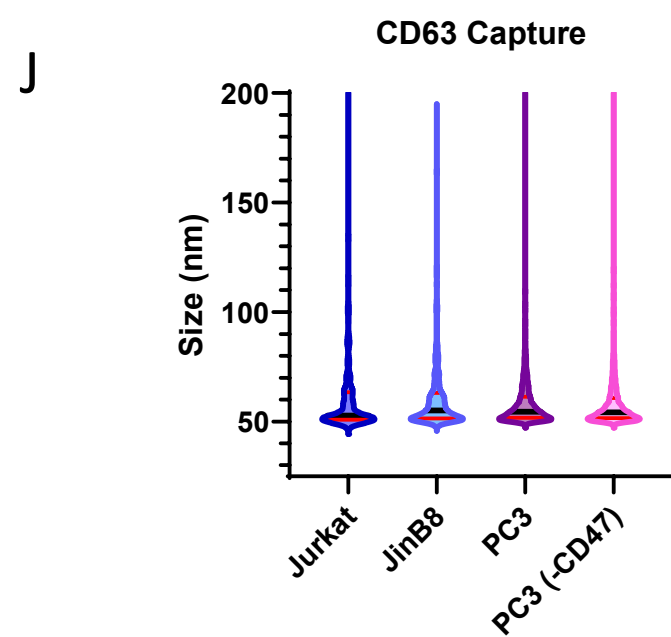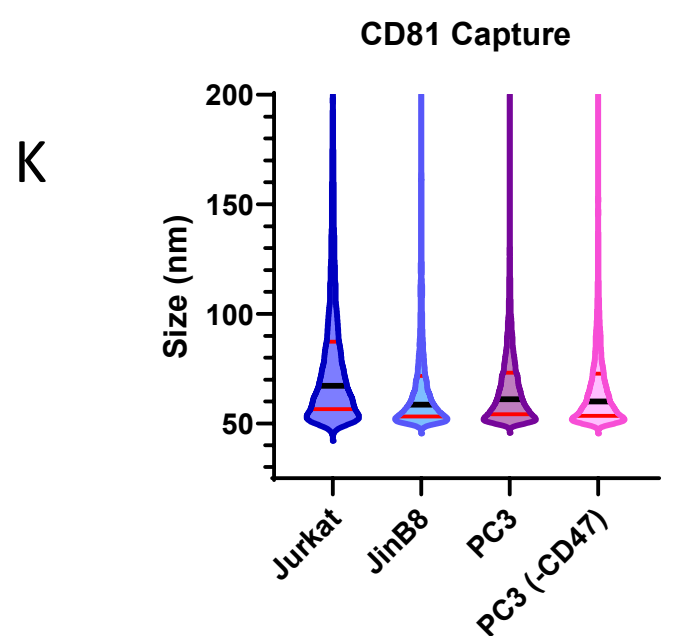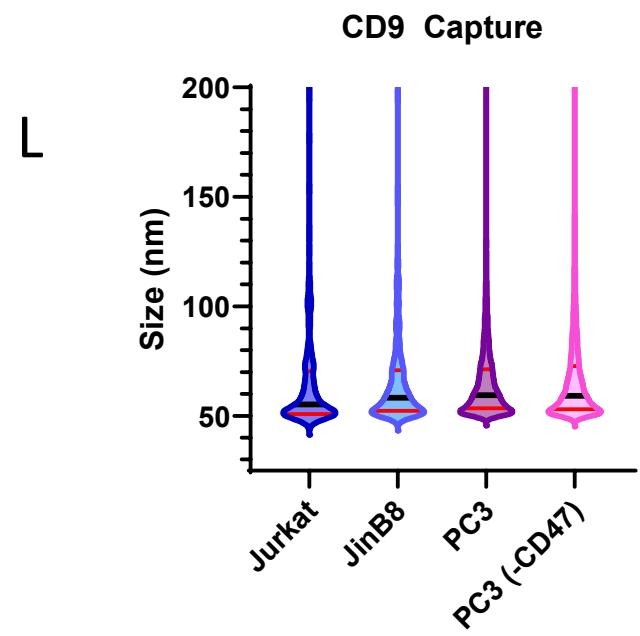

Figure S3

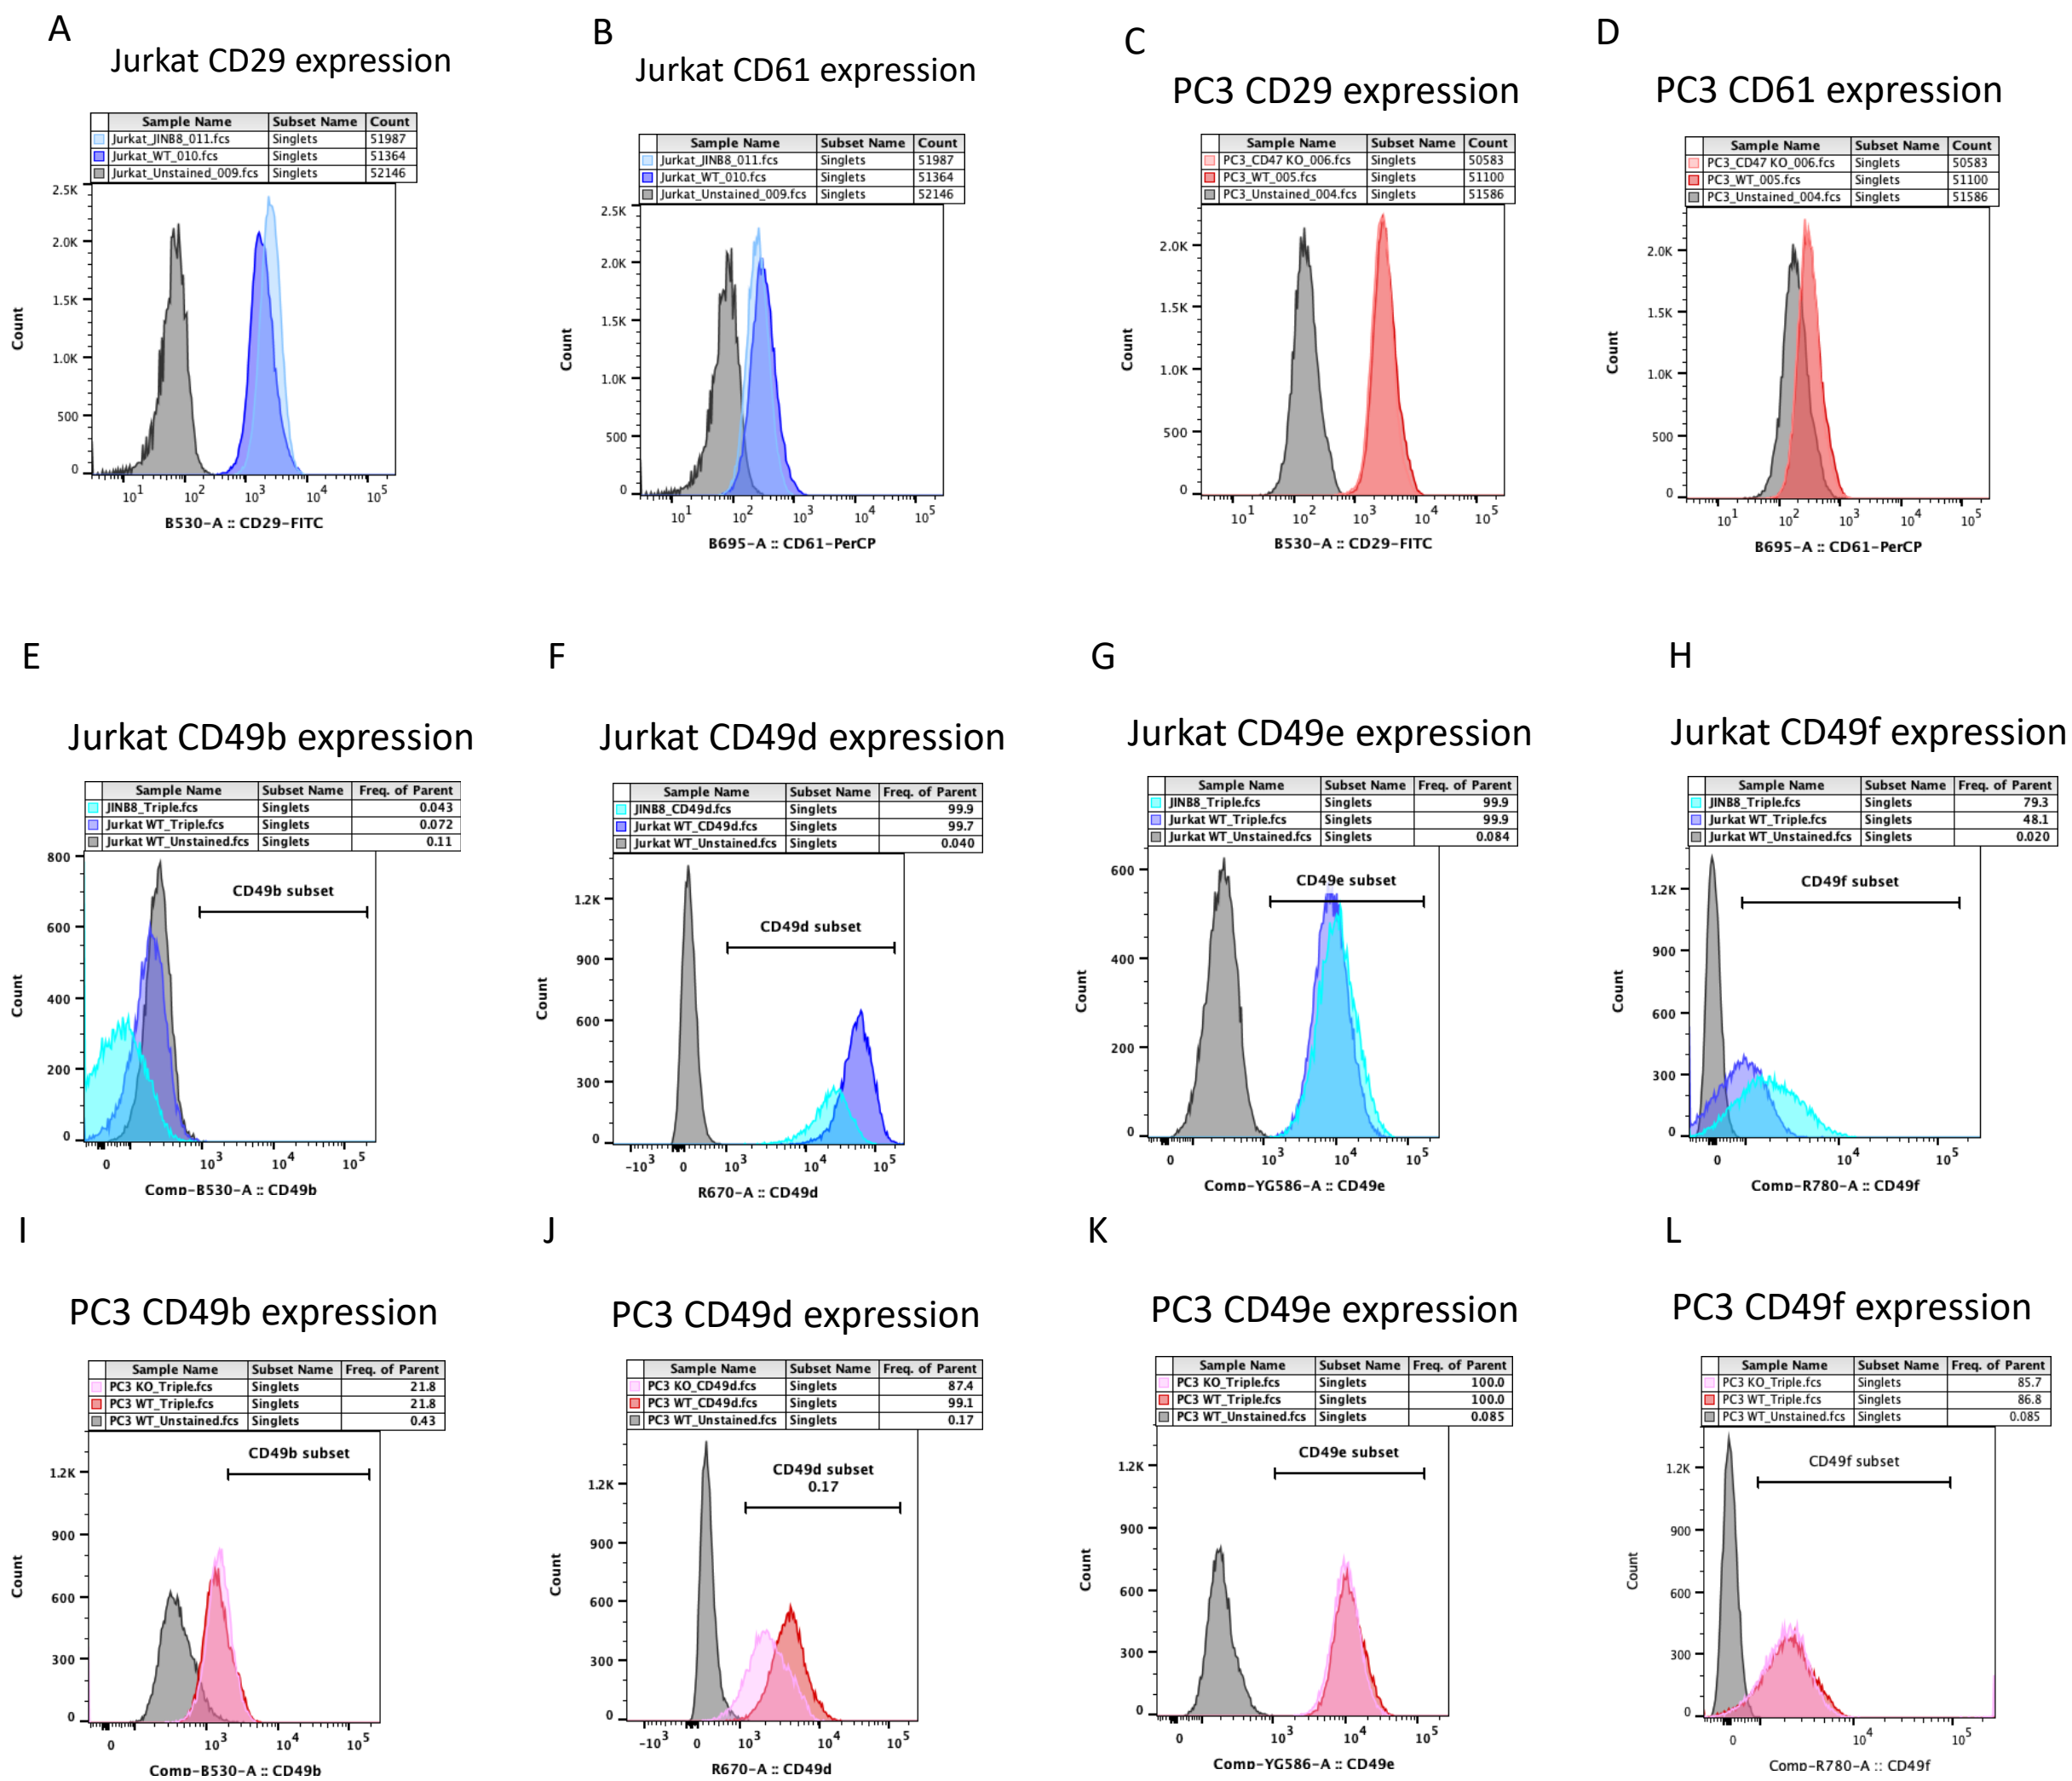

**M**

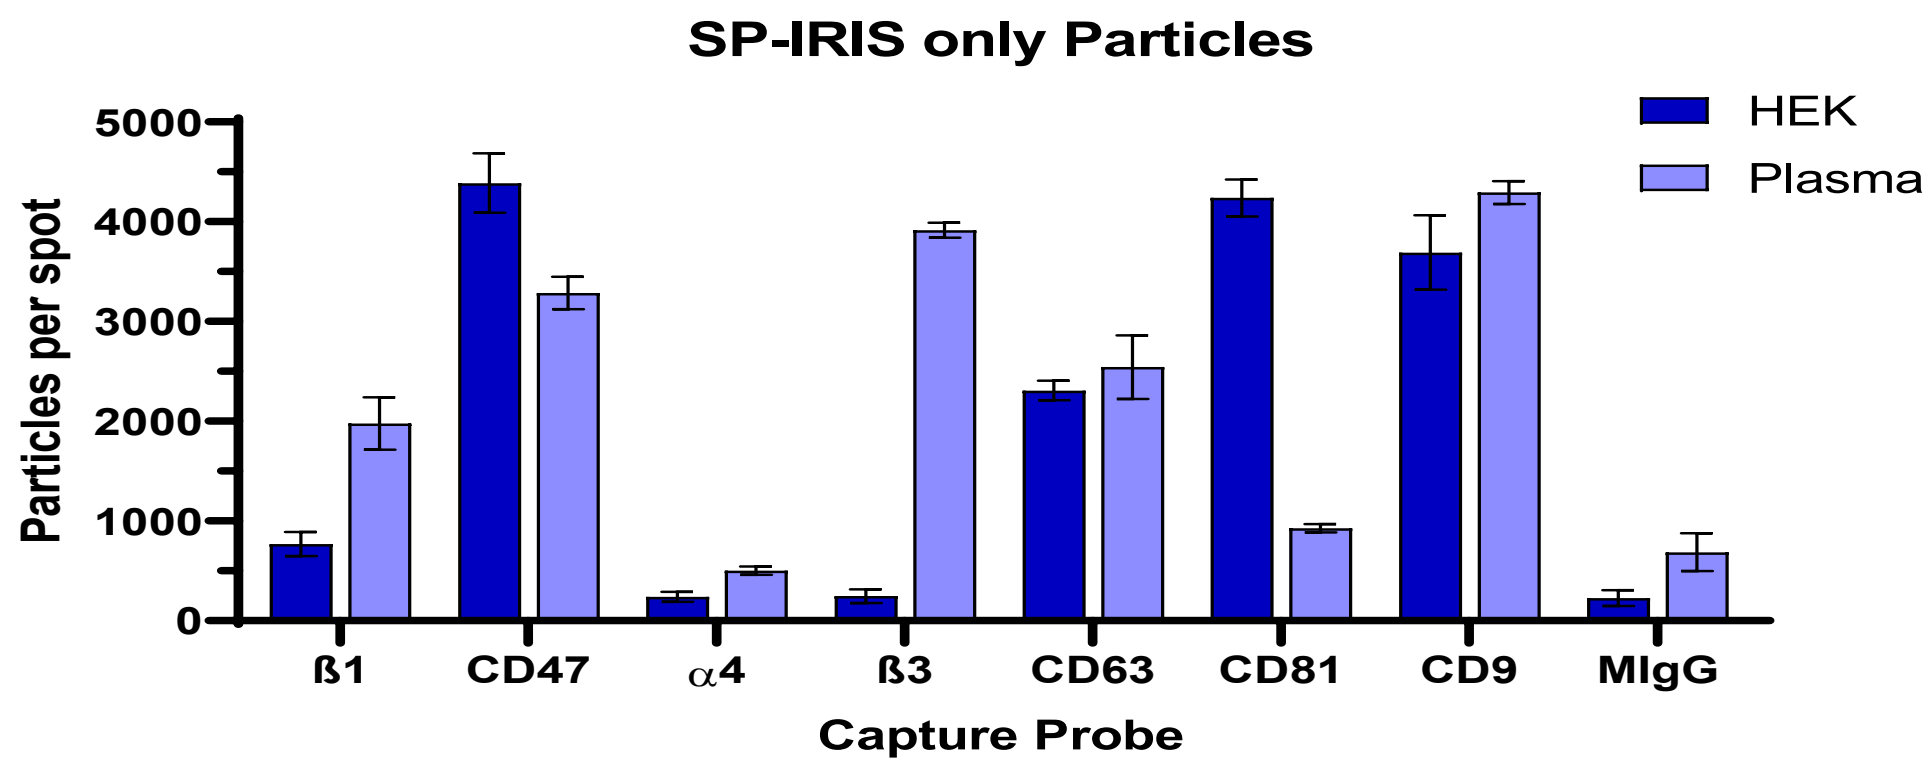

Figure S4

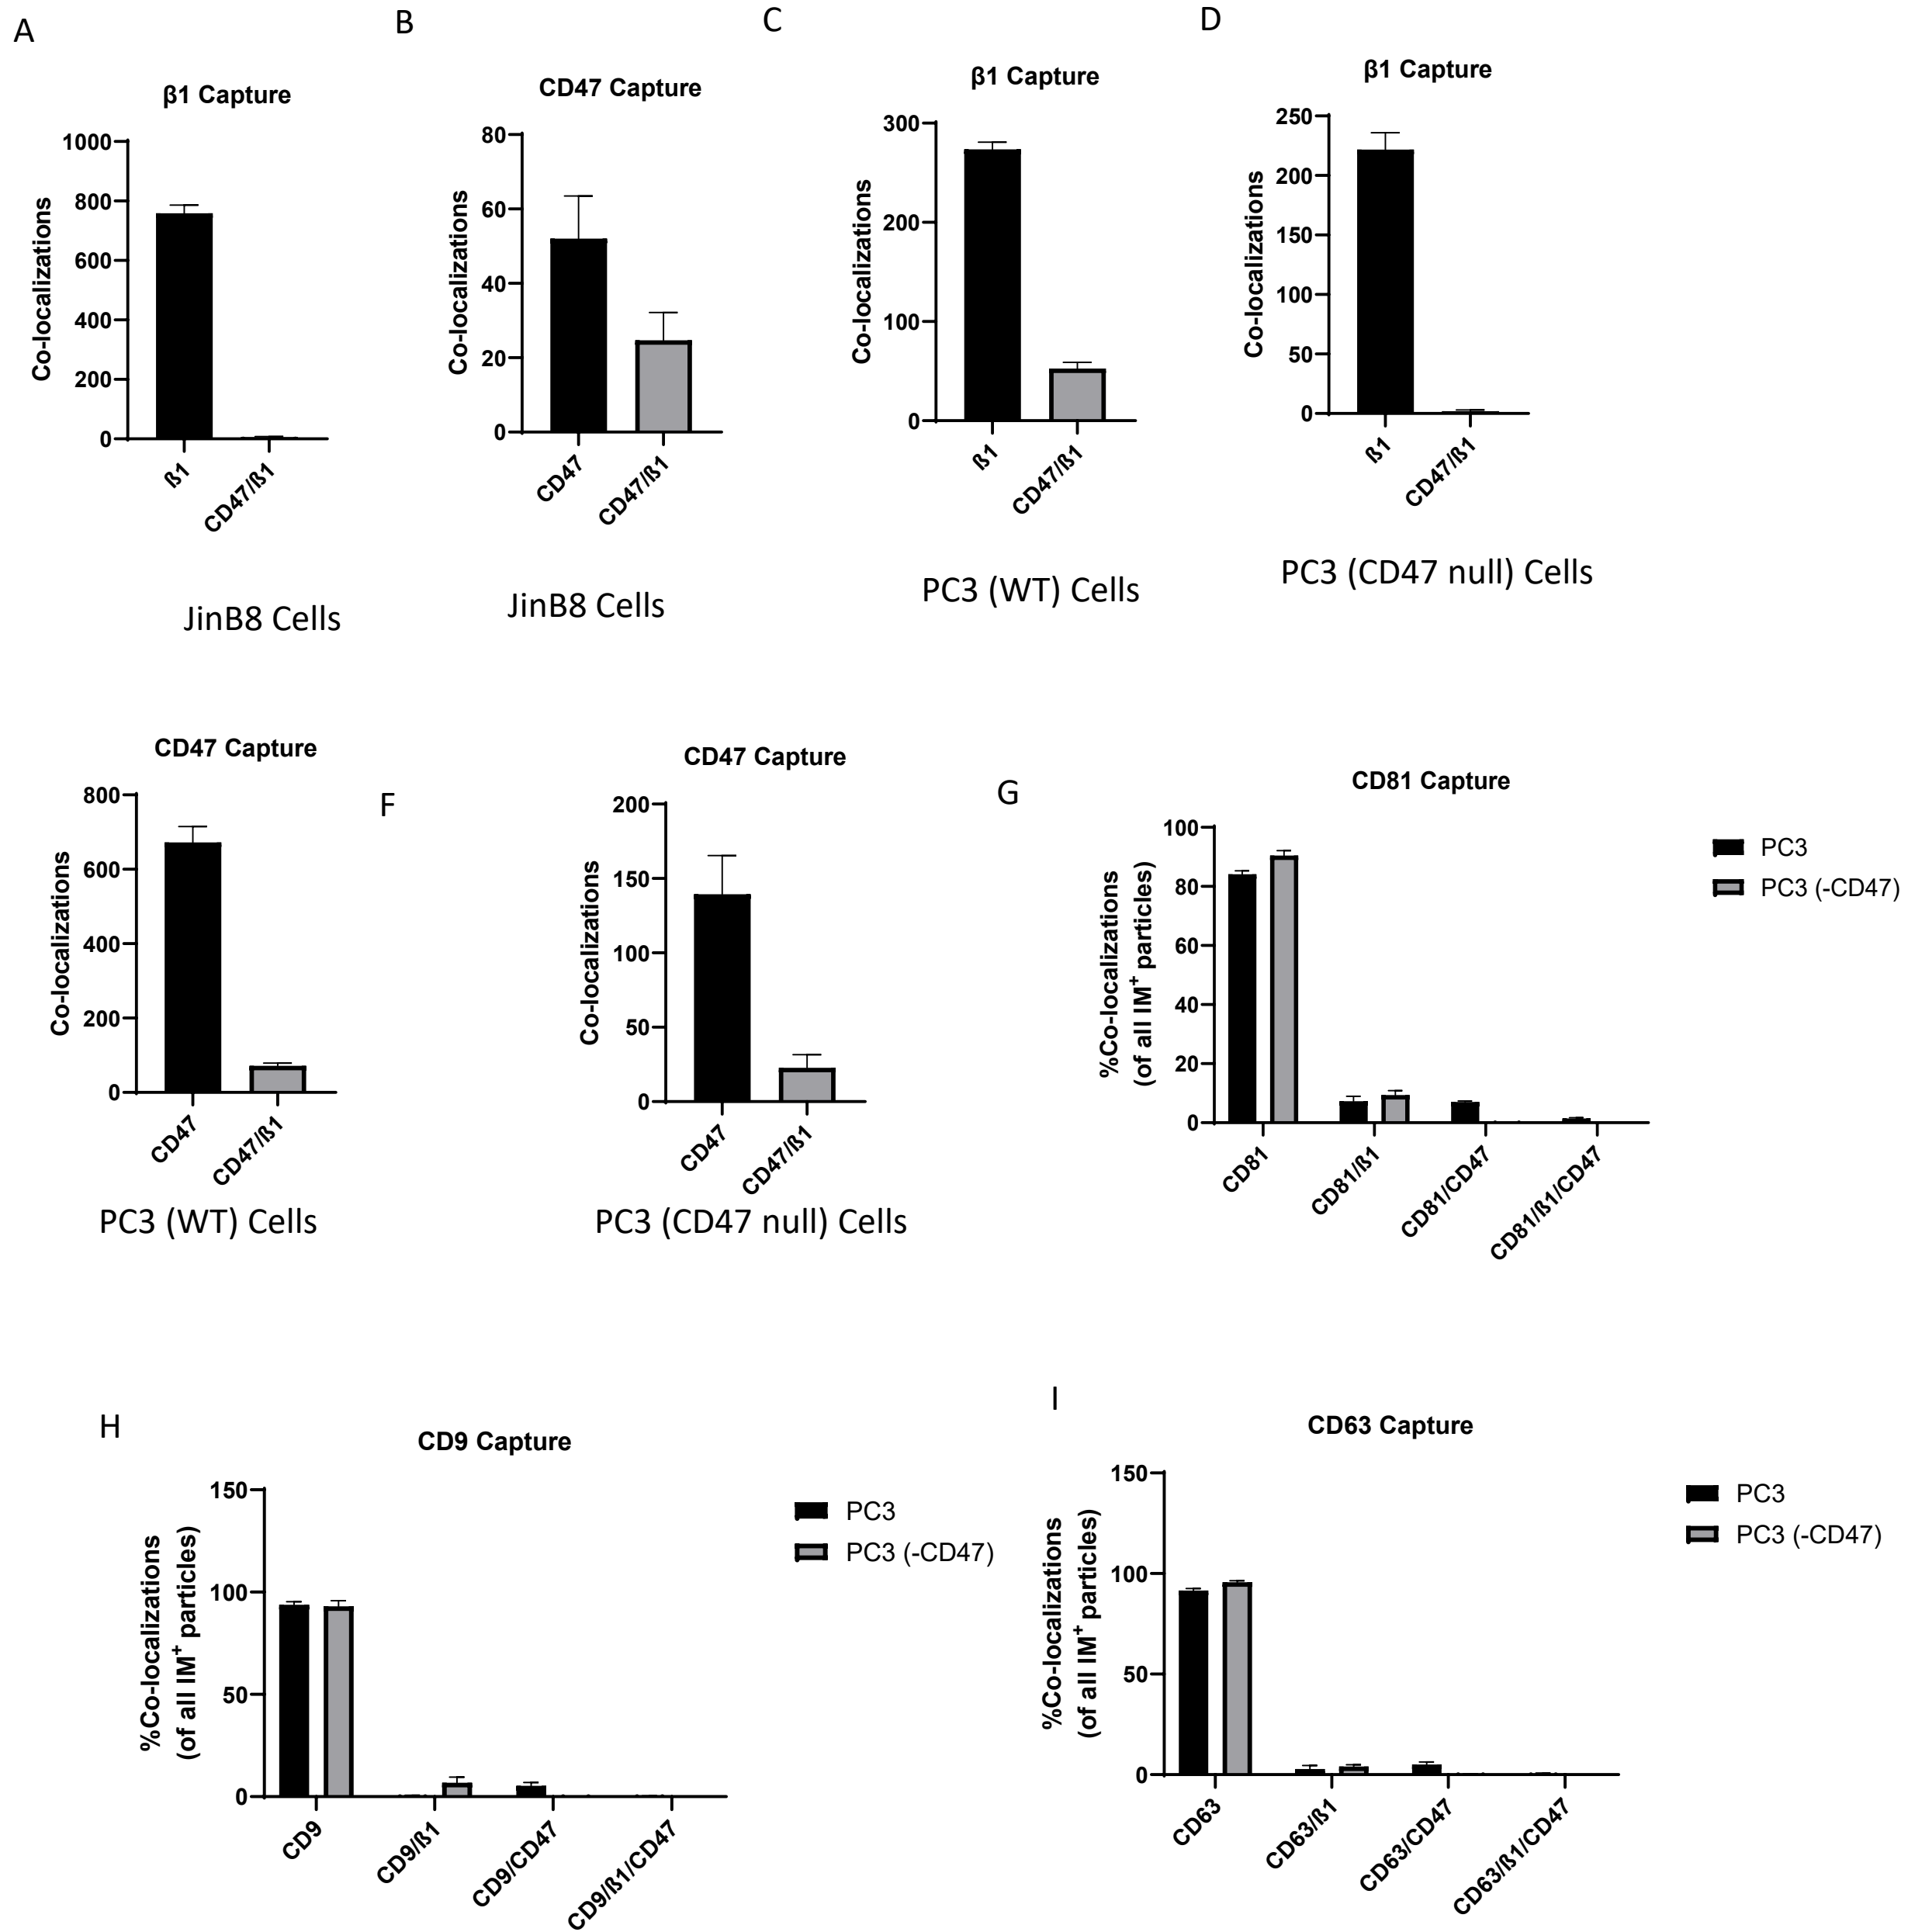

Figure S5

### SP-IRIS/Tetraspanin Particles in Jurkat

A

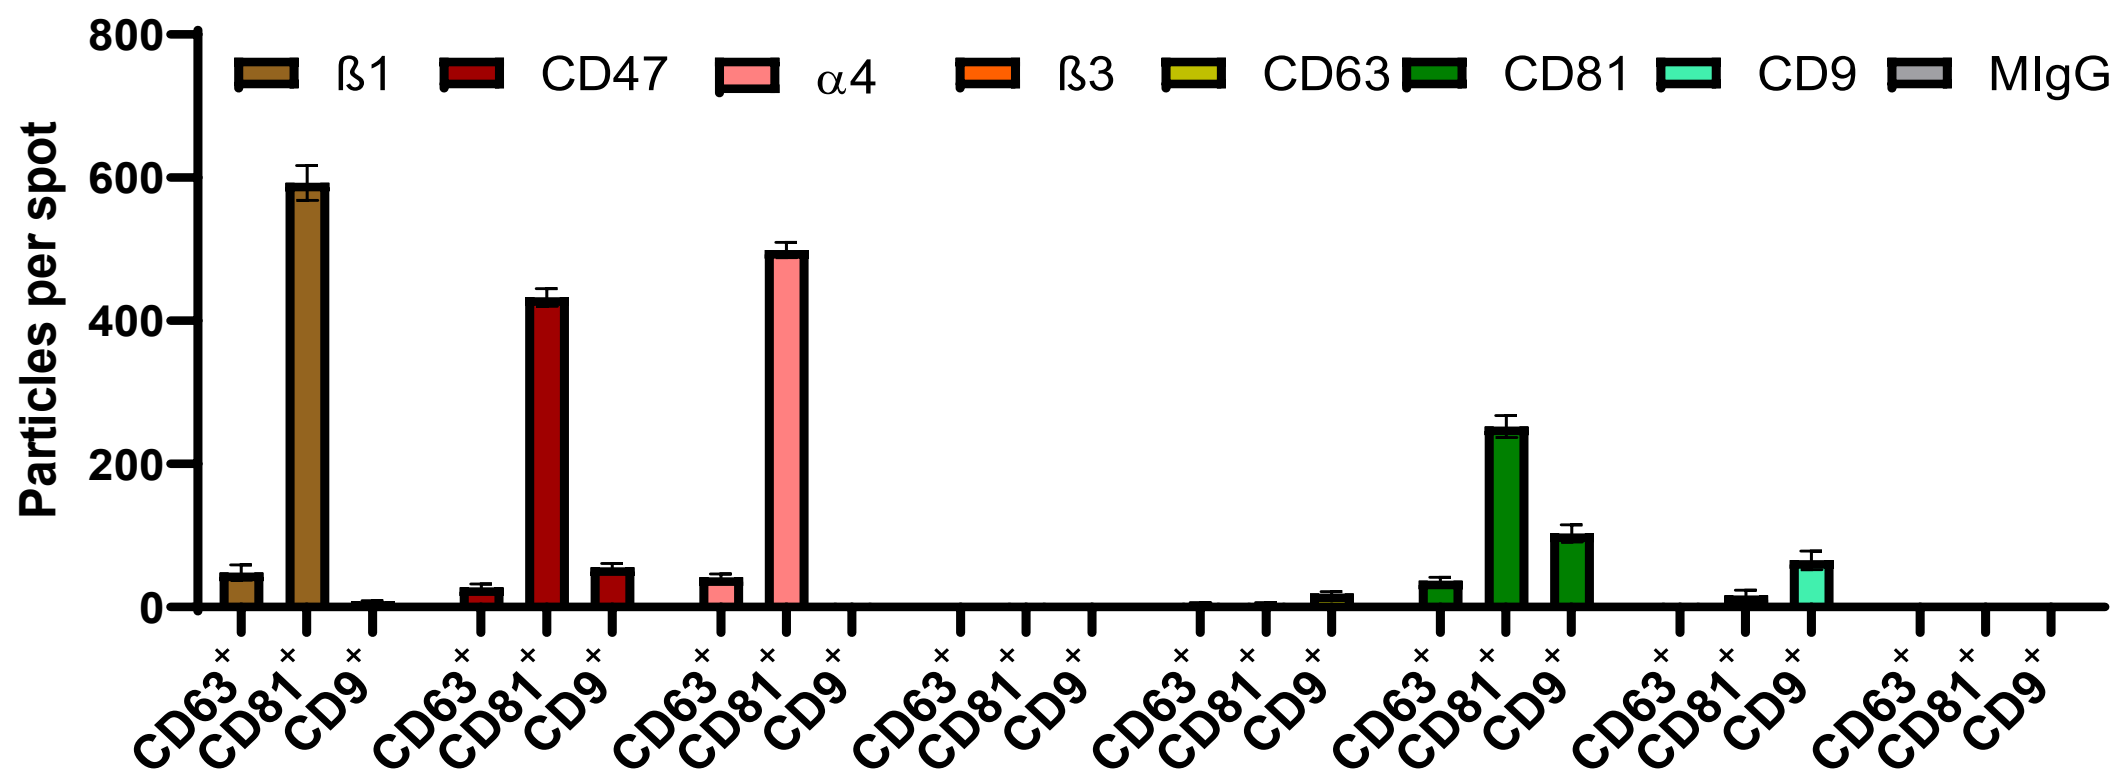

B

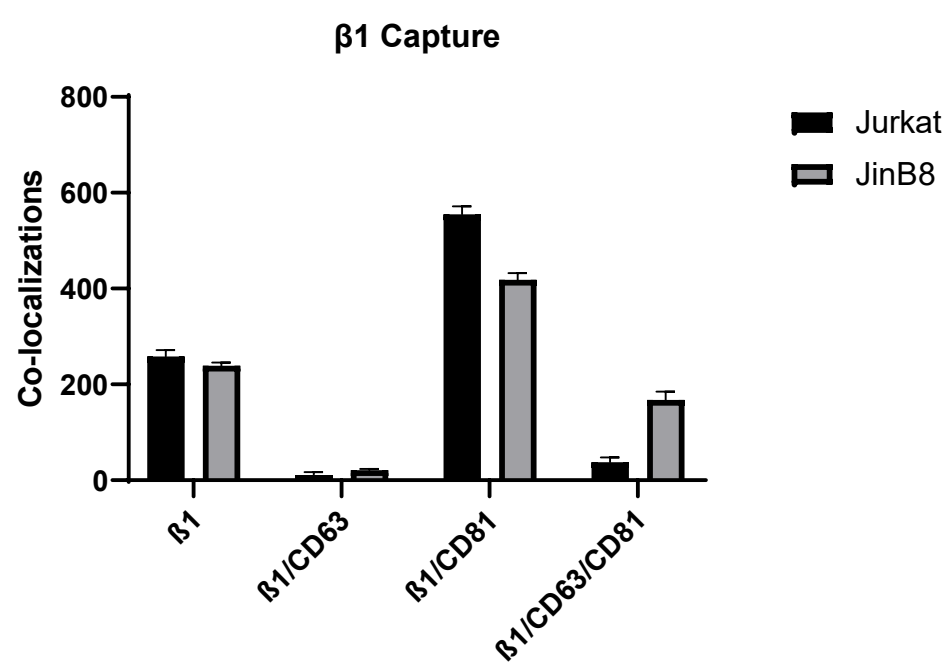

C

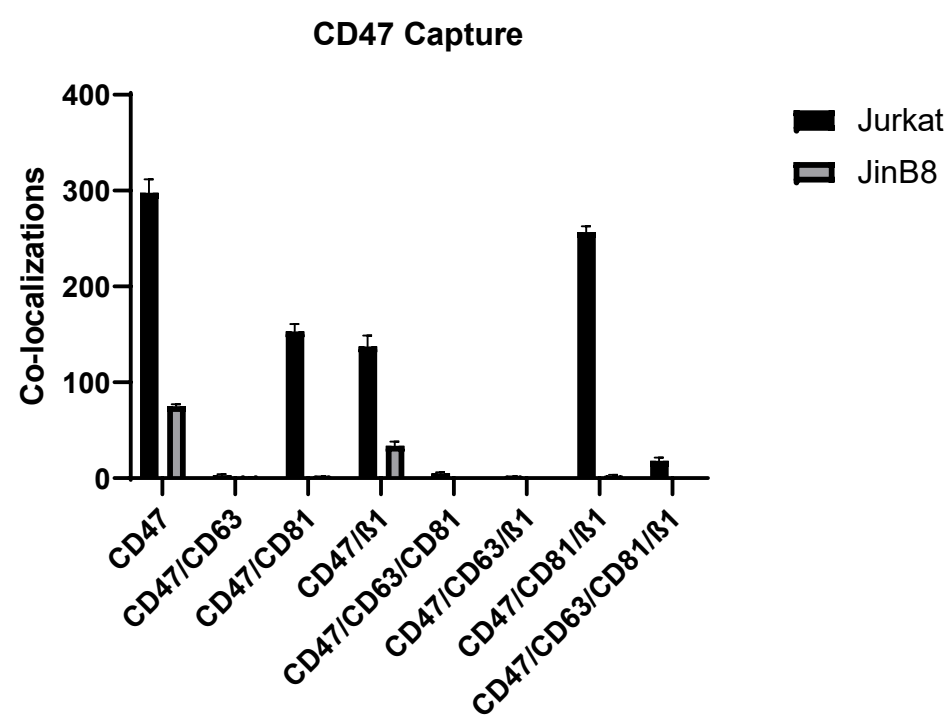

D

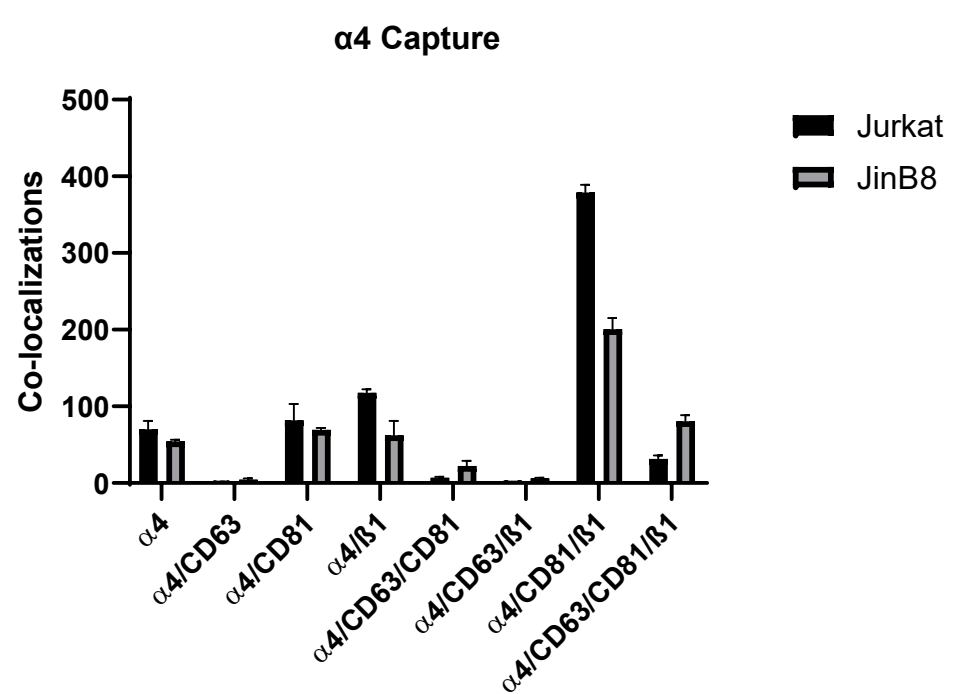

E

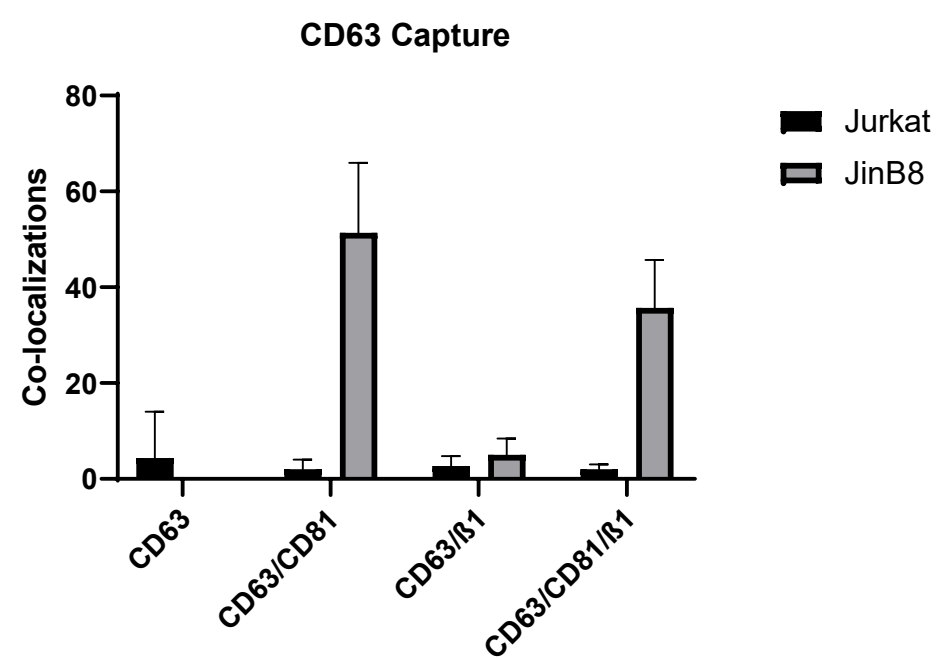

F

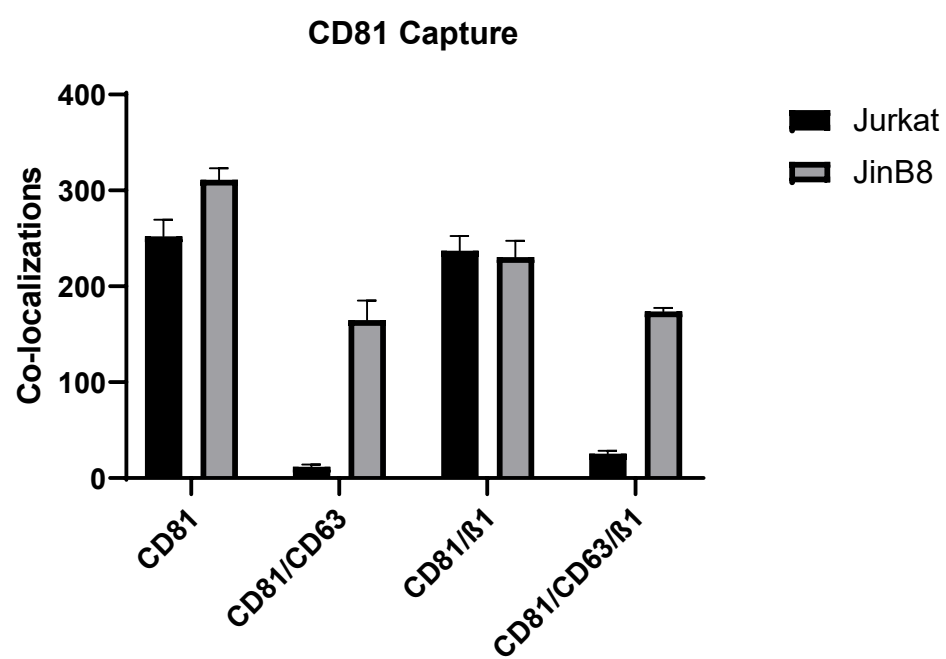

G

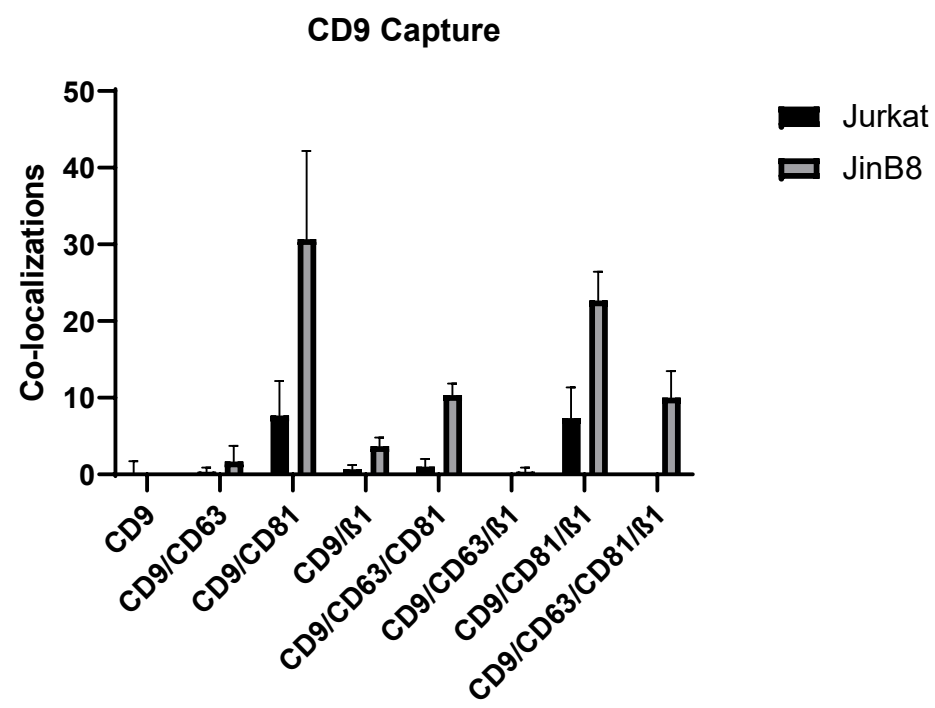

Figure S6

A

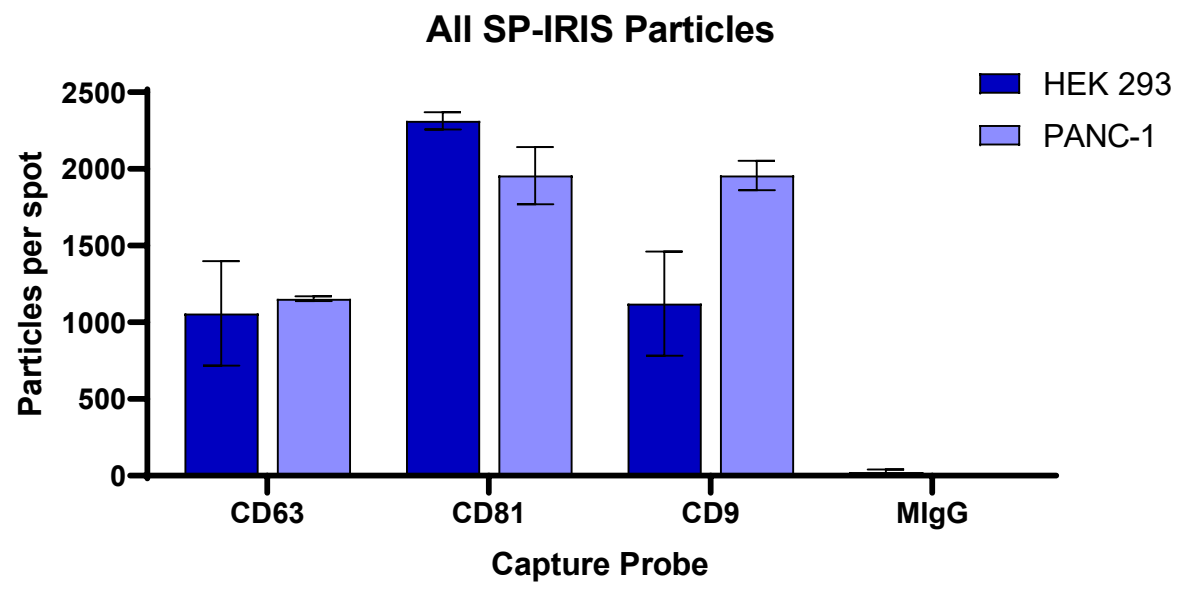

B

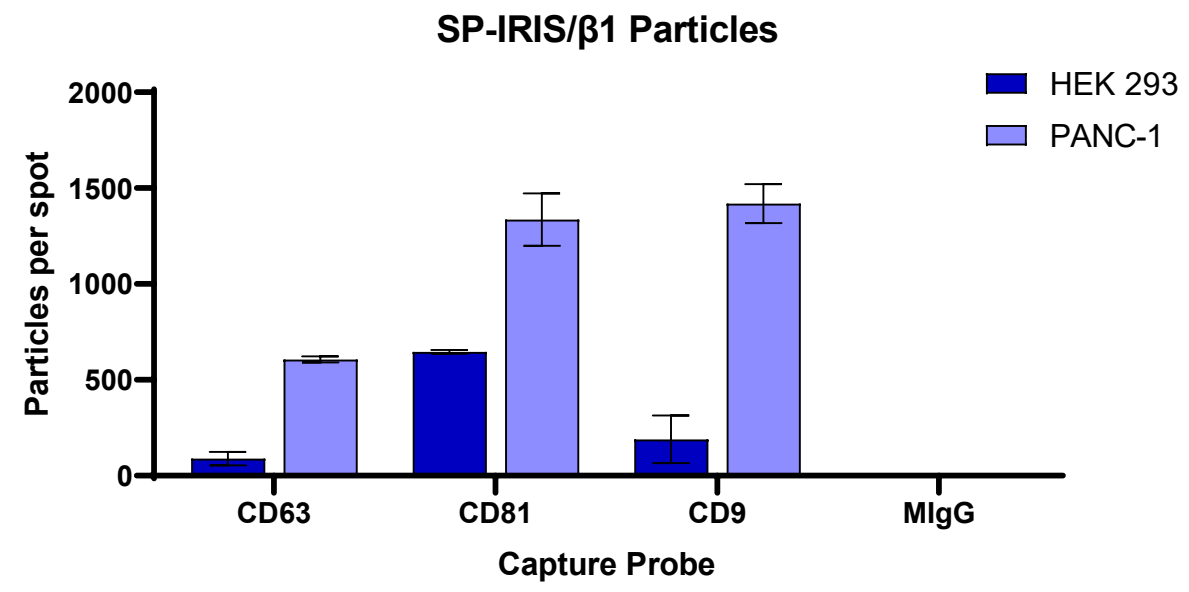

C

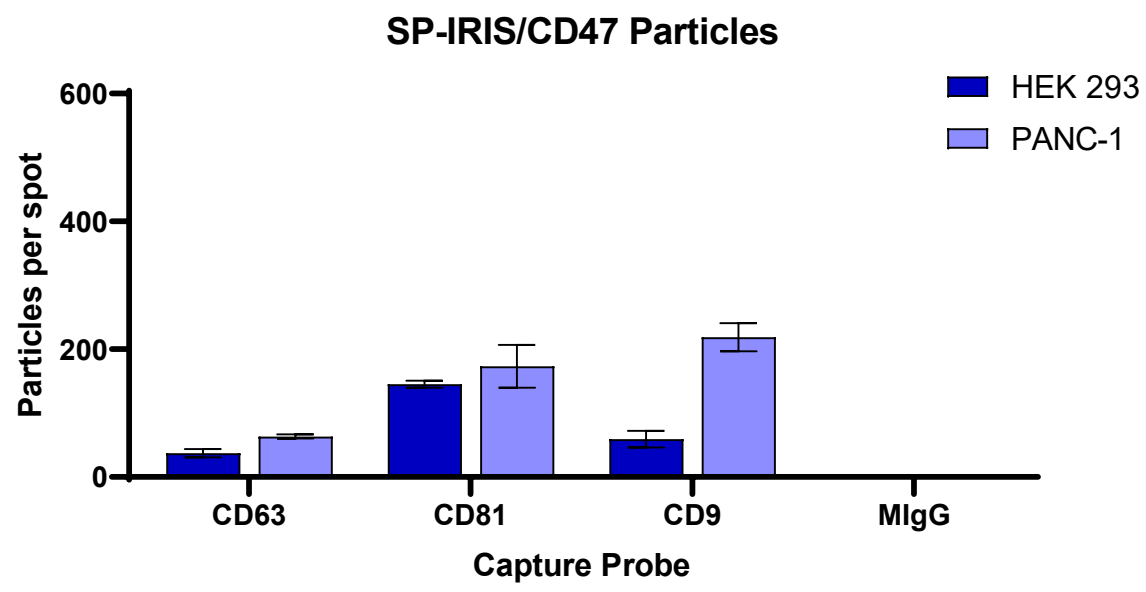

D

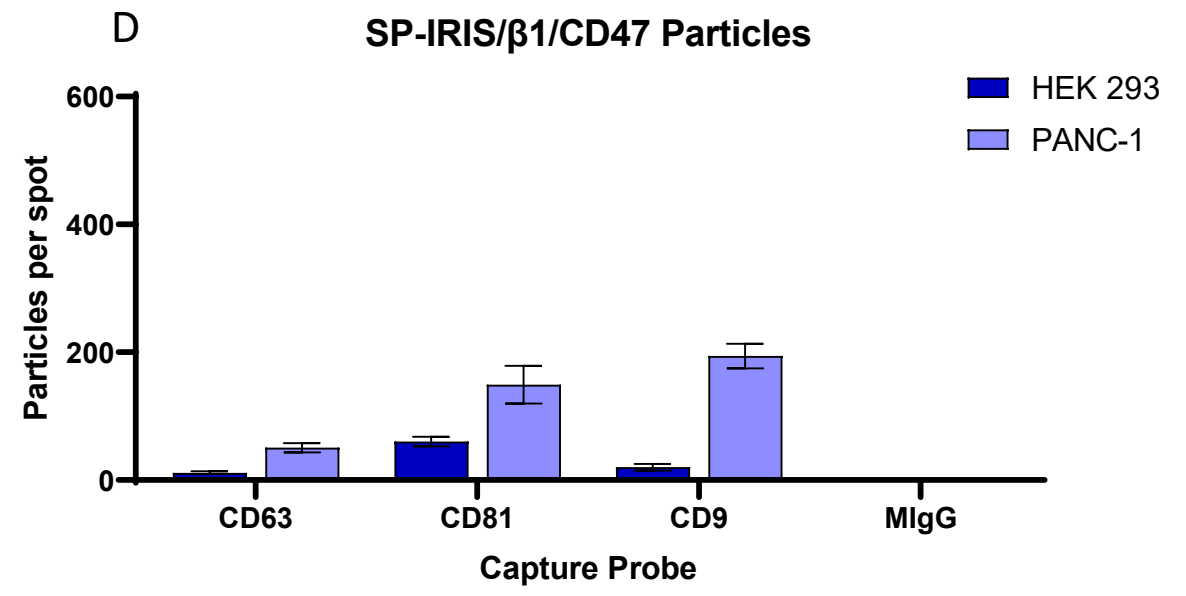

E

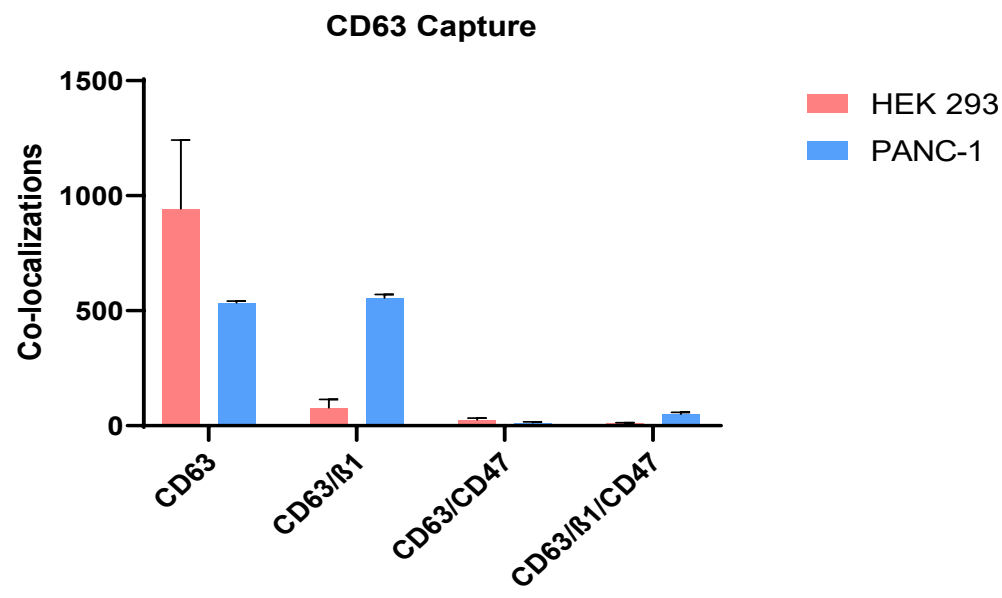

F

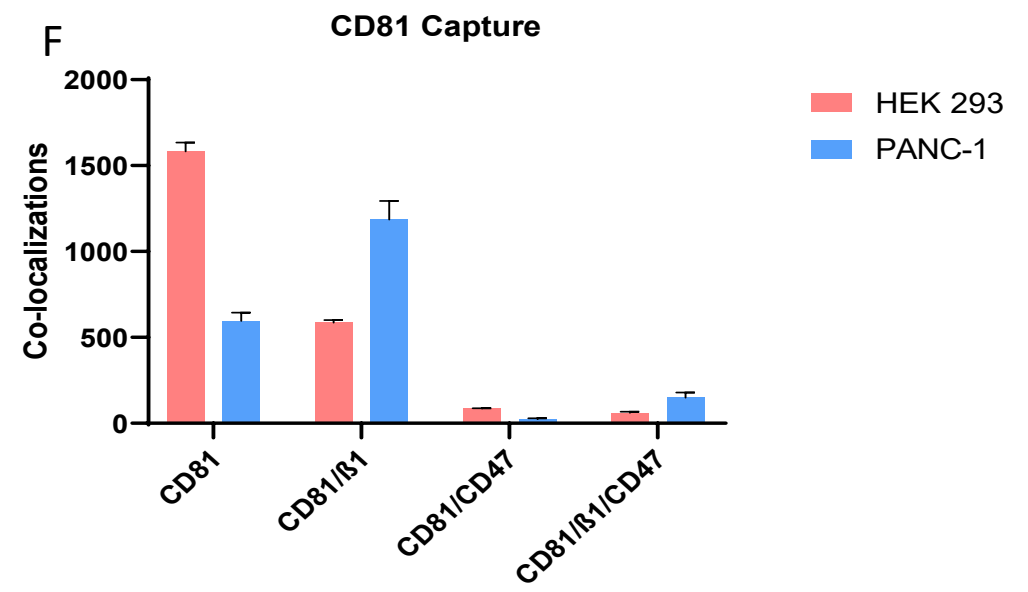

G

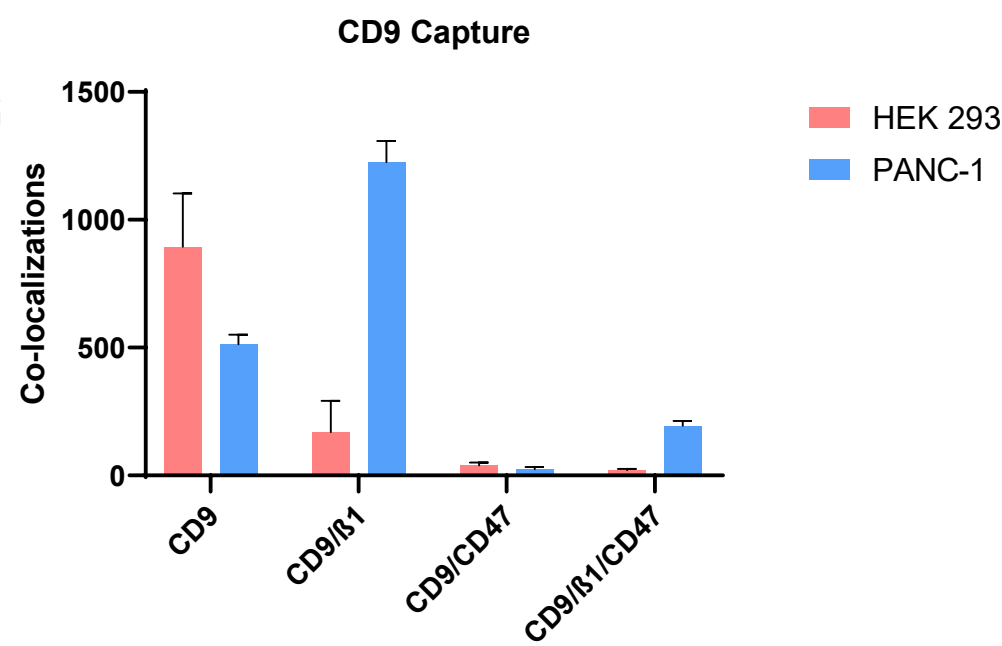

H

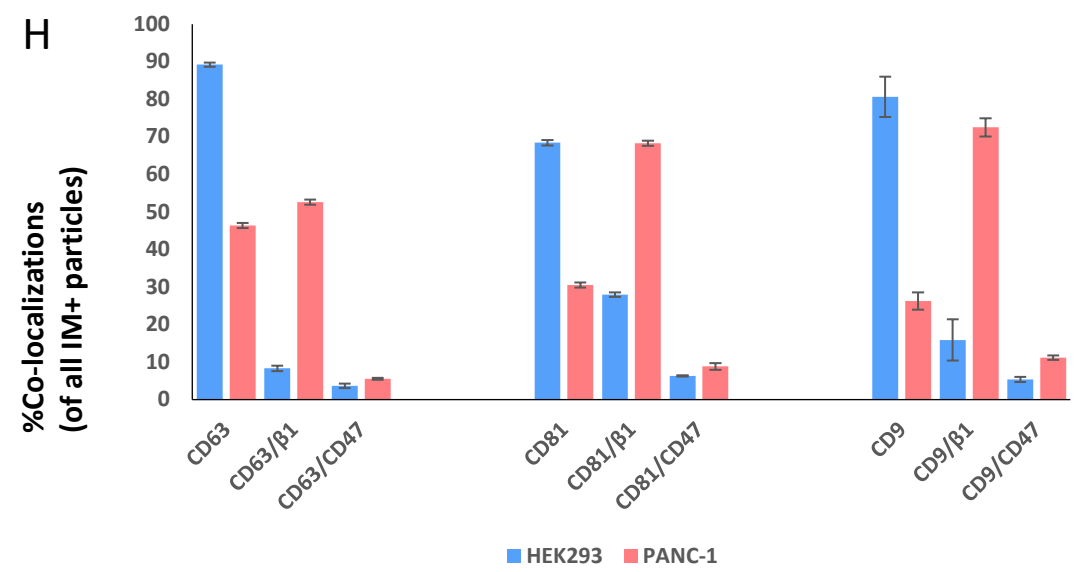

Supplement: JEV2-11-e12265-s001.pdf [file JEV2-11-e12265-s001.pdf]
